# Supplementary material for: Synthesis, spectral characterization, DFT, antimicrobial, cell cycle and molecular docking studies on benzothiazole derivatives and its nano-sized platinum (IV) mixed ligand complex
Source: Research Square preprint supplement (doi:10.21203/rs.3.rs-6839678/v1), 2025-07-04
Supplement: Supplementary file 1 [file 42f0ed734aeaf49cbd461f09.docx]

**Supporting information for**

**Synthesis, spectral characterization, DFT, antimicrobial, cell cycle and molecular docking studies on** **benzothiazole derivatives and its** **nano-sized platinum (IV) mixed ligand complex**

**Sharah A. Aldulmania, Afaf Y. Khormia, Abdel-Nasser M. A. Alaghazb*, and Mohamed R. Shaabanc,d**

aDepartment of Chemistry, College of Science, King Khalid University, Abha, Saudi Arabia

bDepartment of Physical Sciences, Chemistry Division, College of Science, Jazan University, P.O. Box. 114, Jazan 45142, Saudi Arabia

cDepartment of Chemistry, Faculty of Applied Science, Umm Al-Qura University, Almukaramah, Makkah, Saudi Arabia

dDepartment of Chemistry, Faculty of Science, Cairo University, Giza 12613, Egypt


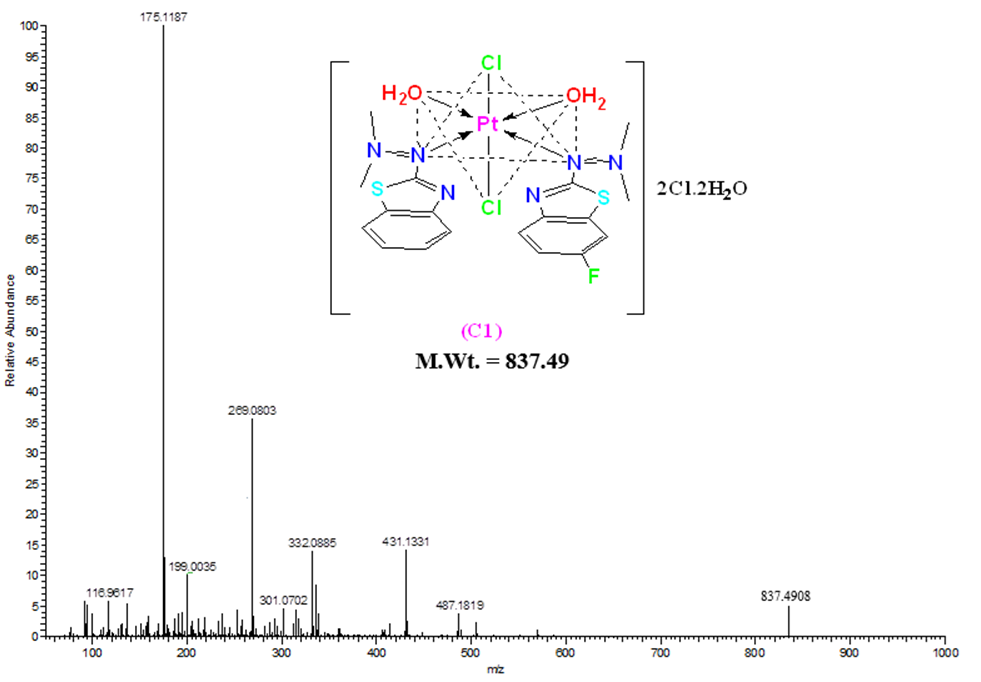


**Figure S1**. Mass spectrum of the platinum (IV) complex C.


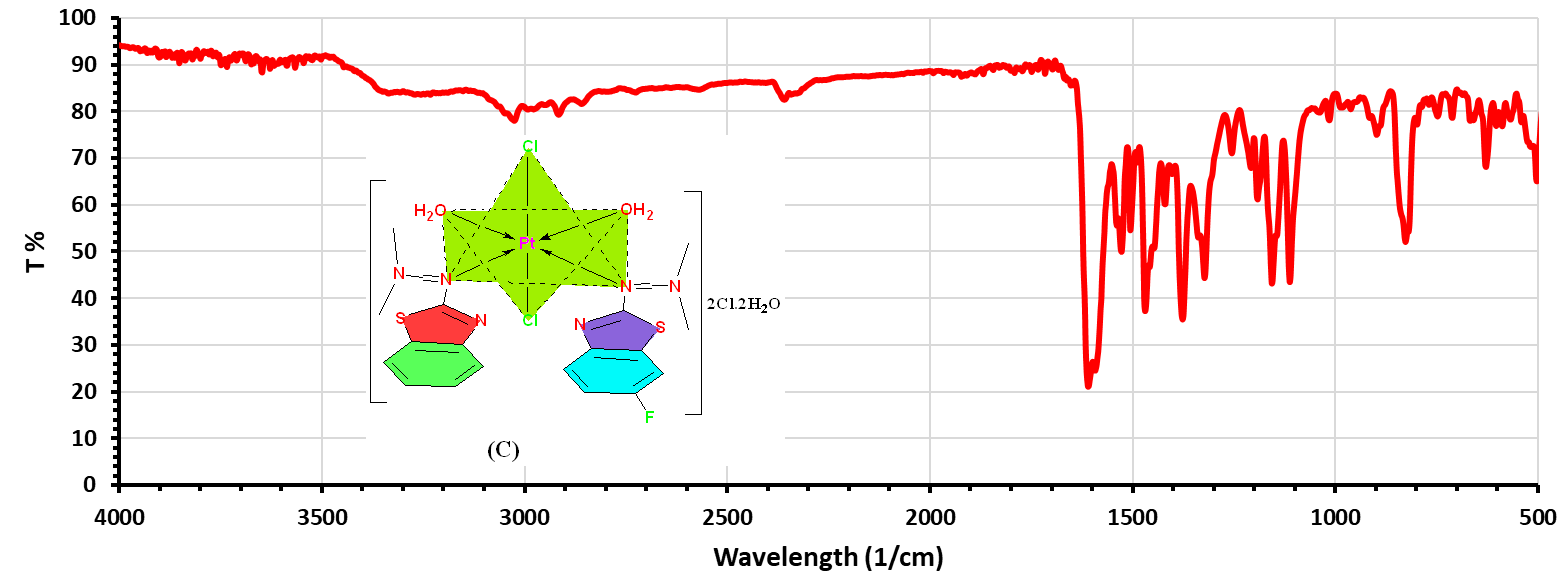


**Figure S2.** FTIR spectrum of the platinum (IV) complex C.


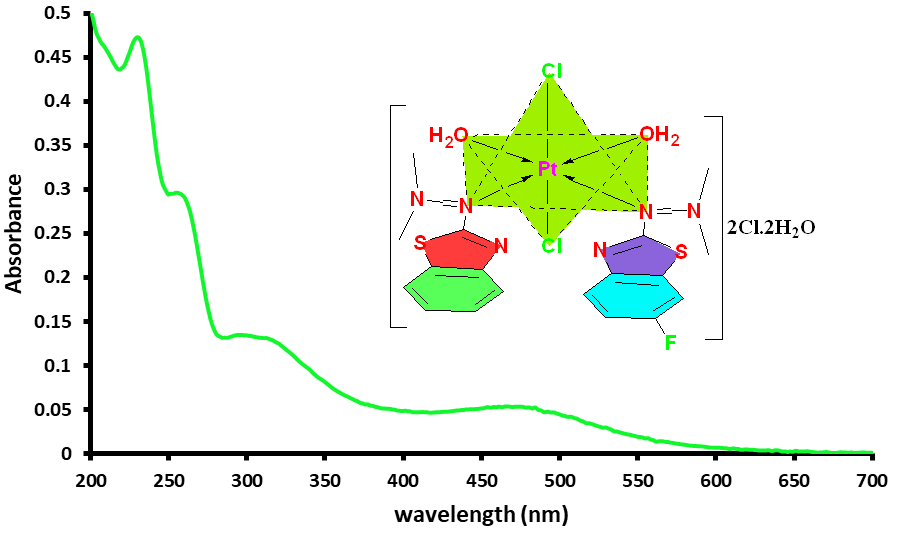


**Figure S3.** UV-Vis absorption spectrum of Ccomplexin DMSO (5×10-5 M).


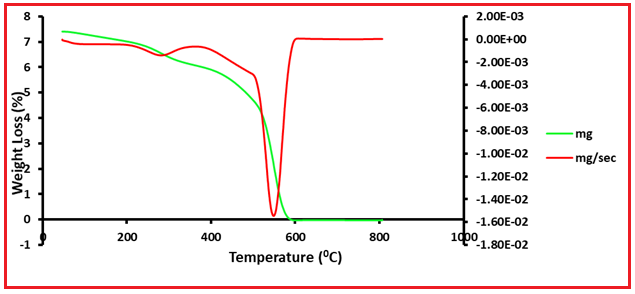


**Figure S4.** TGA curves of the platinum (IV) complex C.

|  |  |
| --- | --- |
| 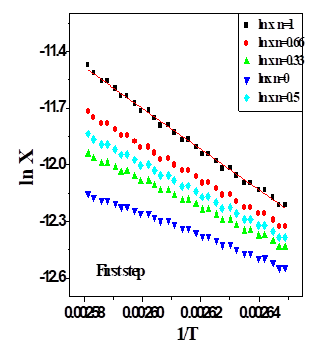 | 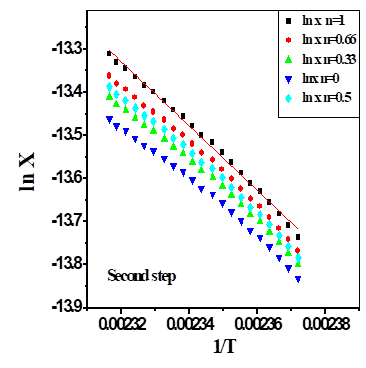 |
| 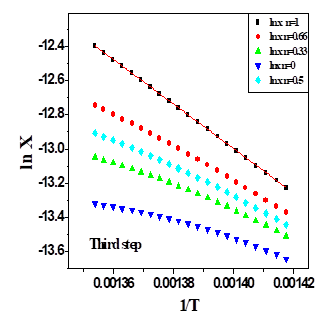 | |

**Figure S5.** Coats–Redfern (CR) of the Pt(IV) complex.

|  |  |
| --- | --- |
| 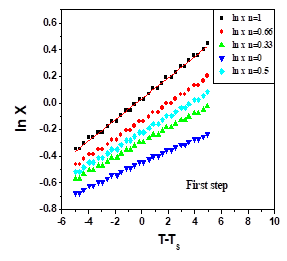 | 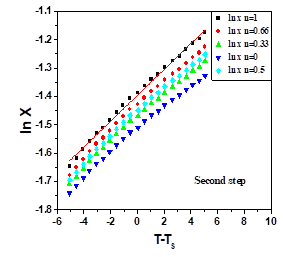 |
| 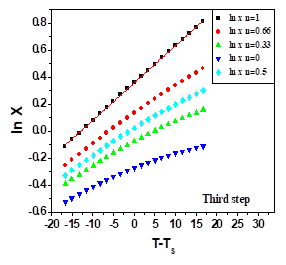 | |

**Figure S6.** Horowitz-Metzger (HM) of the Pt(IV) complex.

| 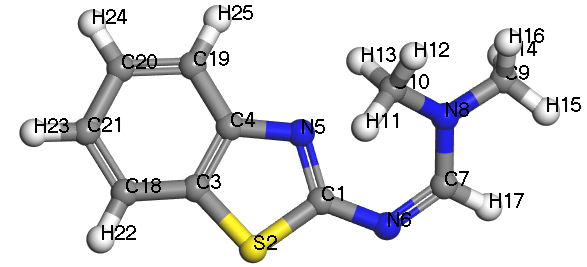 | *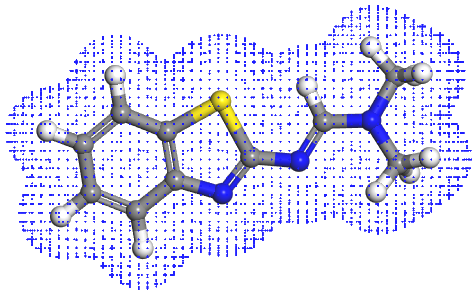* |
| --- | --- |
| Molecular structure of L1 | Electron density |
| *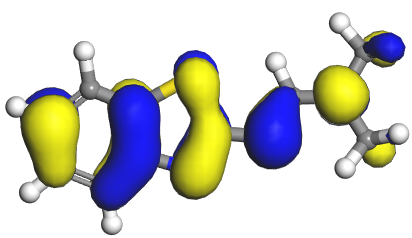* | *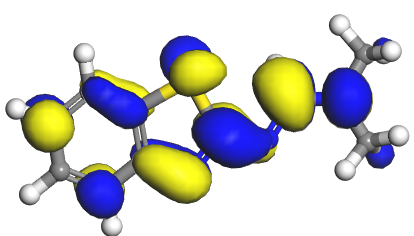* |
| HOMO | LUMO |
| *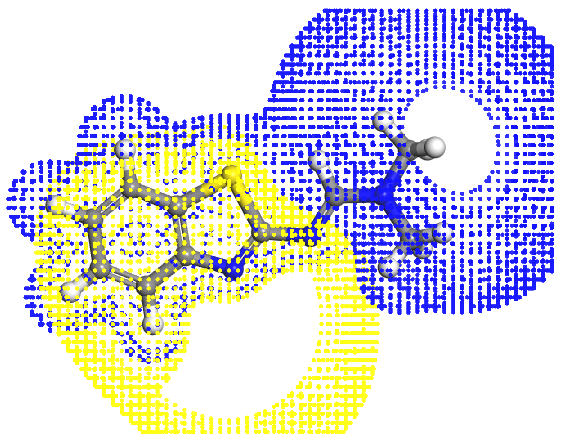* | |
| Electrostatic potential | |

**Figure S7.** The LUMO, HOMO, electron density, electrostatic potential, and molecular structure of the ligand (L1).

| 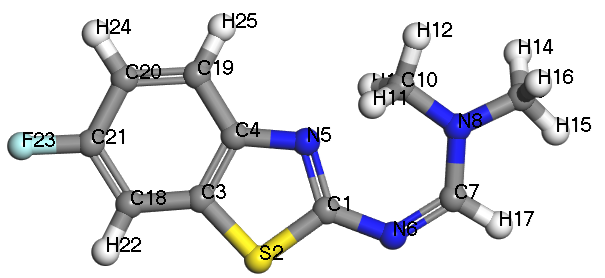 | *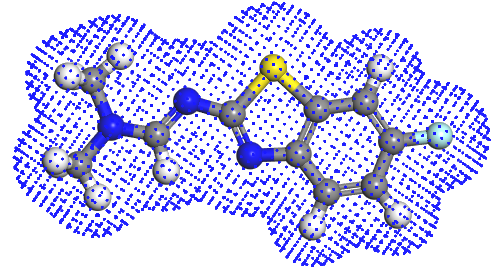* |
| --- | --- |
| Molecular structure of L2 | Electron density |
| *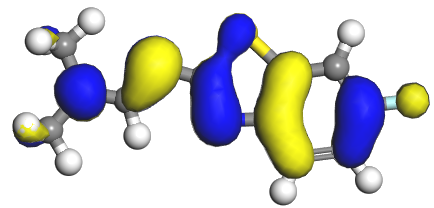* | *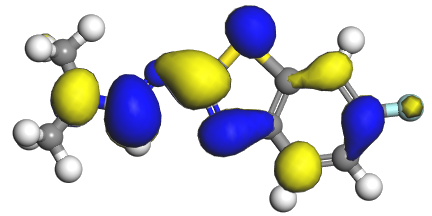* |
| HOMO | LUMO |
| *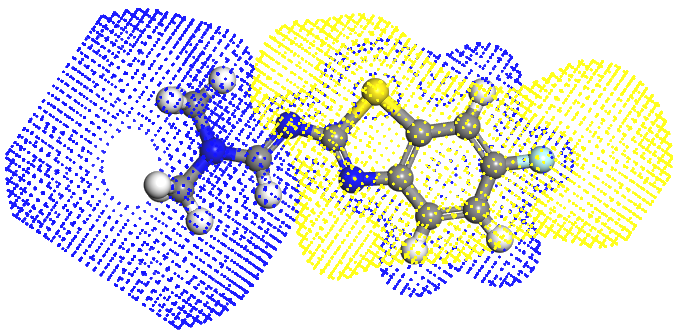* | |
| Electrostatic potential | |

**Figure S8.** The LUMO, HOMO, electron density, electrostatic potential, and molecular structure of the ligand (L2).


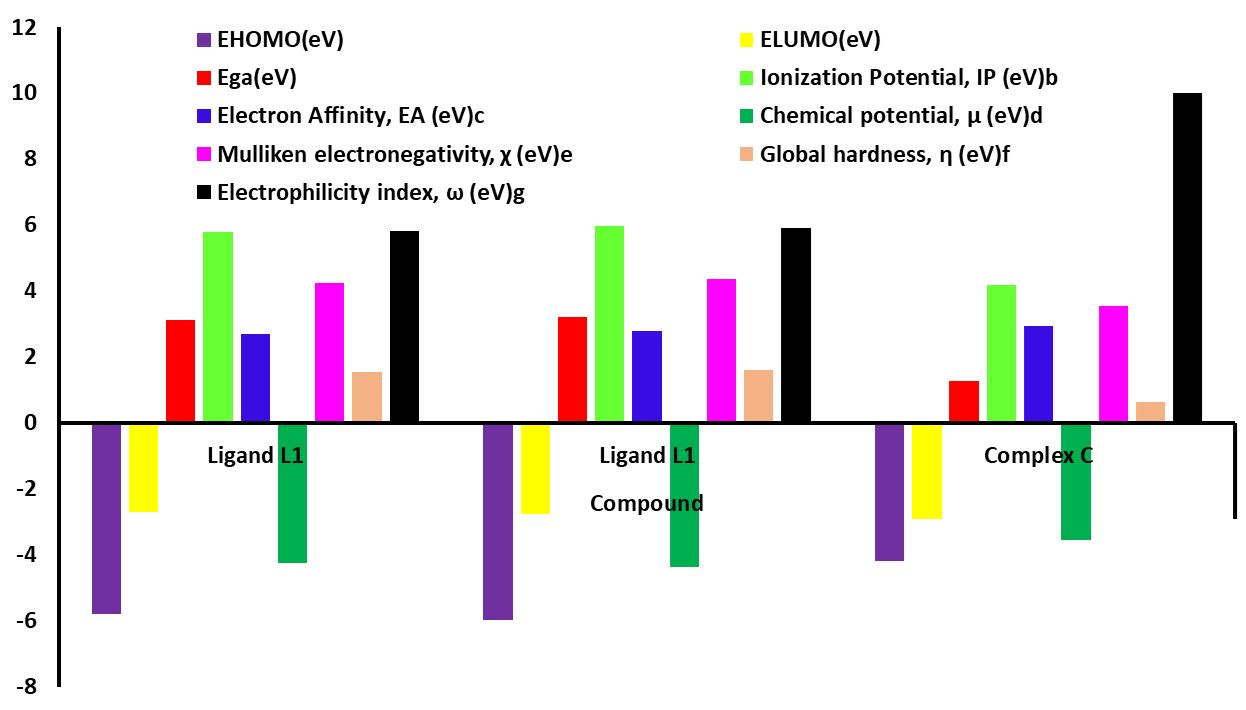


**Figure S9.** Calculated energy of HOMO, LUMO, ionization potentials and energy gaps (ΔE) of the ligands (L1 and L2) and nano-sized Pt(IV) complex (C).


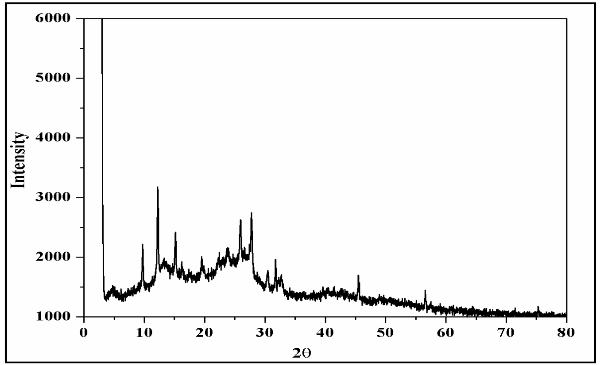


**Figure S10**. Powder XRD patterns of the Pt(IV) complex.


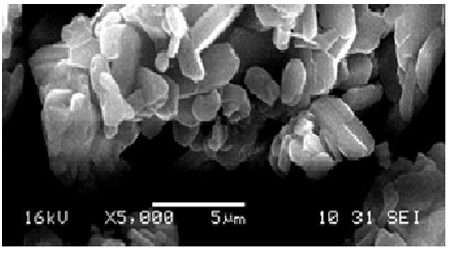


**Figure S11.** SEM image of the mixed ligand Pt(IV) complex C.

**Table S1** Thermogravimetric data (TGA) of the platinum (IV) complex (C)

| **Compound** | **step** | **Temperature range (oC)** | **decomposed** | **Weight loss; Calcd (Found %)** |
| --- | --- | --- | --- | --- |
| **C-[Pt(L1L2)(H2O)2Cl2]Cl2.2H2O** | 1st | 26‒223 | 2H2O | 4.30(4.29) |
|  | 2nd | 223‒318 | 2H2O + 2Cl2 | 21.23(21.22) |
|  | 3rd | 318‐512 | C16H21N6FS2 | 45.43(45.42) |
|  | Residue | 512‒798 | Pt+4C | 29.03(29.00) |

**Table S2**

C complex' Kinetic parameters derived from Coats–Redfern (CR) and Horowitz-Metzger (HM) methods.

| **∆G***  **KJ\mol** | **∆S***  **KJ\mol.K** | **∆H***  **KJ\mol** | **A**  **(S-1)** | **Ea**  **KJ\mol** | **Mid**  **Temp(K)** | **Peak** | **Method** |
| --- | --- | --- | --- | --- | --- | --- | --- |
| 98.47 | ‒0.1752 | 48.02 | 2.14x103 | 35.47 | 206 | 1st | **CR** |
| 192.12 | ‒0.1865 | 58.89 | 2.21x103 | 65.82 | 273 | 2nd |
| 231.89 | ‒0.1222 | 134.63 | 2.39x107 | 139.99 | 487 | 3rd |
| 261.65 | ‒0.0787 | 182.01 | 7.14x108 | 191.79 | 683 | 4th |
| 98.48 | ‒0.1763 | 48.77 | 2.40x103 | 35.12 | 206 | 1st | **HM** |
| 192.47 | ‒0.1877 | 59.14 | 2.28x103 | 65.71 | 273 | 2nd |
| 232.04 | ‒0.1243 | 135.07 | 2.10x107 | 138.39 | 487 | 3rd |
| 260.76 | ‒0.0796 | 181.75 | 6.93 x108 | 192.07 | 206 | 4th |

**Table S3.** Thermogravimetric data (TGA) of the platinum (IV) complex C

| **Complex** | **step** | **Temperature range (oC)** | **decomposed** | **Weight loss; Calcd (Found %)** |
| --- | --- | --- | --- | --- |
| **[Pt(L1L2)(H2O)2Cl2]Cl2.2H2O** | 1st | 26‒223 | 2H2O | 4.30 (4.29) |
|  | 2nd | 223‒318 | 2H2O + 2Cl2 | 21.23 (21.22) |
|  | 3rd | 318‐512 | C16H21N6FS2 | 45.43 (45.42) |
|  | Residue | 512‒798 | Pt+4C | 29.03 (29.00) |

**Table S4.** Kinetic parameters of the platinum (IV) complex C.

| Complex | Step | Mid temp (K) | order (n) | R2 | Ea | A | ∆H* | ∆S* | ∆G* |
| --- | --- | --- | --- | --- | --- | --- | --- | --- | --- |
| KJ/mol | (S-1) | KJ/mol | J/Kmol | KJ/mol |
| **[Pt(L1)(L2)(H2O)2(Cl)2].2Cl.2H2O** | 1st | 352.14 | 0.00 | 0.9940063 | 69.32 | 6.351011 | 71.26 | -111.25 | 95.33 |
| 2nd | 456.43 | 1.50 | 0.9899747 | 77.53 | 5.20×1013 | 78.25 | -105.98 | 102.45 |
| 3rd | 582.92 | 1.00 | 0.9999867 | 89.67 | 8.88×1011 | 82.74 | -96.58 | 187.10 |

**Table S5.** Selected bond length (Å) of L1.

| **Bond** | **Length(Å)** | **Bond** | **Length(Å)** | **Bond** | **Length(Å)** |
| --- | --- | --- | --- | --- | --- |
| N(8)-C(10) | 1.376 | N(8)-C(9) | 1.363 | N(8)-C(7) | 1.223 |
| N(6)-C(7) | 1.493 | N(6)-C(1) | 1.507 | N(5)-C(1) | 1.335 |
| N(5)-C(4) | 1.338 | S(2)-C(1) | 1.681 | S(2)-C(3) | 1.673 |
| C(3)-C(4) | 1.406 | C(18)-C(21) | 1.407 | C(19)-C(20) | 1.412 |

**Table S6.** Selected bond angle (**°**) of L1

| **Angle** | **Degree (°)** | **Angle** | **Degree (°)** | **Angle** | **Degree (°)** |
| --- | --- | --- | --- | --- | --- |
| C(9)-N(8)-C(10) | 119.356 | N(8)-C(7)-N(6) | 114.666 | C(10)-N(8)-C(7) | 119.786 |
| N(8)-C(1)-N(5) | 174.712 | C(1)-N(5)-C(4) | 127.108 | N(5)-C(4)-C(19) | 118.146 |
| C1(16)-S(2)-C(3) | 118.352 | N(6)-C(1)-S(2) | 136.456 | S(2)-C(3)-C(18) | 169.574 |

**Table S*7*.** Selected bond length (Å) of L2.

| **Bond** | **Length(Å)** | **Bond** | **Length(Å)** | **Bond** | **Length(Å)** |
| --- | --- | --- | --- | --- | --- |
| N(8)-C(10) | 1.372 | N(8)-C(9) | 1.369 | N(8)-C(7) | 1.222 |
| N(6)-C(7) | 1.496 | N(6)-C(1) | 1.512 | N(5)-C(1) | 1.338 |
| N(5)-C(4) | 1.333 | S(2)-C(1) | 1.684 | S(2)-C(3) | 1.679 |
| C(21)-F(23) | 1.603 | C(18)-C(21) | 1.407 | C(19)-C(20) | 1.413 |

**Table S8.** Selected bond angle (**°**) of L2

| **Angle** | **Degree (°)** | **Angle** | **Degree (°)** | **Angle** | **Degree (°)** |
| --- | --- | --- | --- | --- | --- |
| C(9)-N(8)-C(10) | 119.343 | N(8)-C(7)-N(6) | 114.666 | C(10)-N(8)-C(7) | 119.786 |
| N(8)-C(1)-N(5) | 174.712 | C(1)-N(5)-C(4) | 127.108 | N(5)-C(4)-C(19) | 118.146 |
| C1(16)-S(2)-C(3) | 118.352 | N(6)-C(1)-S(2) | 136.456 | S(2)-C(3)-C(18) | 169.574 |
| F(23)-C(21)-C(18) | 123.639 |  |  |  |  |

**Table S9.** Selected bond length (Å) of **complex (C)**.

| **Bond** | **Length(Å)** | **Bond** | **Length(Å)** | **Bond** | **Length(Å)** |
| --- | --- | --- | --- | --- | --- |
| Pt(25)-O(29) | 1.911 | Pt(25)-O(28) | 1.924 | Pt(25)-Cl(27) | 2.247 |
| Pt(25)-Cl(26) | 2.245 | Pt(25)-C(20) | 1.383 | Pt(25)-Cl(10) | 1.348 |
| N(22)-C(23) | 1.372 | N(8)-C(24) | 1.369 | N(8)-C(21) | 1.221 |
| N(12)-C(13) | 1.370 | N(8)-C(14) | 1.367 | N(8)-C(11) | 1.223 |
| N(16)-C(15) | 1.496 | N(16)-C(17) | 1.512 | N(16)-C(15) | 1.332 |
| N(10)-C(11) | 1.493 | N(10)-C(1) | 1.512 | N(5)-C(1) | 1.338 |
| N(5)-C(4) | 1.332 | S(19)-C(15) | 1.683 | S(19)-C(18) | 1.677 |
| S(2)-C(1) | 1.686 | S(2)-C(3) | 1.678 | C(7)-F(47) | 1.608 |

**Table S10.** Selected bond angle (**°**) of **complex (C).**

| **Angle** | **Degree (°)** | **Angle** | **Degree (°)** | **Angle** | **Degree (°)** |
| --- | --- | --- | --- | --- | --- |
| O(28)-Pt(25)-O(29) | 126.584 | O(29)-Pt(25)-Cl(27) | 74.306 | O(28)-Pt(25)-Cl(27) | 97.246 |
| O(29)-Pt(25)-Cl(26) | 168.582 | O(28)-Pt(25)-Cl(26) | 96.804 | Cl(26)-Pt(25)-Cl(27) | 174.993 |
| Cl(27)-Pt(25)-N(10) | 158.056 | Cl(27)- Pt(25)-N(20) | 89.053 | Cl(26)- Pt(25)-N(10) | 154.828 |
| Cl(26)- Pt(25)-N(20) | 89.108 | O(37)-Cu(41)-S(19) | 96.421 | O(37)-Cu(41)-N(4) | 166.634 |
| O(28)-Pt(25)-N(10) | 125.364 | O(28)-Pt(25)-N(20) | 124.994 | C(10)-Pt(25)-N(20) | 111.580 |
| C(11)-N(10)-Pt(25) | 130.421 | C(21)-N(20)-Pt(25) | 114.526 | C(23)-N(22)-C(24) | 123.042 |
| C(14)-N(12)-C(13) | 118.479 | C(15)-N(16)-C(17) | 119.342 | N(22)-C(21)-N(20) | 114.675 |
| N(12)-C(11)-N(10) | 114.672 | C(15)-S(19)-C(18) | 117.473 | C(1)-S(2)-C(3) | 118.655 |

**Table S11.** The Mulliken charge distribution for L1 ligand

| Atom | **Charge** | **Atom** | **Charge** | **Atom** | **Charge** |
| --- | --- | --- | --- | --- | --- |
| C(1) | 0.165 | S(2) | -0.369 | C(3) | -0.049 |
| C(4) | -0.068 | N(5) | -0.407 | N(6) | 0.224 |
| C(7) | -0.138 | N(8) | -0.135 | C(9) | -0.205 |
| C(10) | -0.212 | H(11) | -0.102 | H(12) | -0.107 |
| H(13) | 0.126 | H(14) | 0.339 | H(15) | 0.229 |
| H(16) | 0.092 | H(17) | 0.112 | C(18) | 0.124 |
| C(19) | 0.108 | C(20) | 0.106 | C(21) | 0.129 |
| C(22) | 0.149 | H(23) | 0.097 | H(24) | 0.067 |
| H(25) | 0.086 |  |  |  |  |

**Table S12.** The Mulliken charge distribution for L2 ligand

| **Atom** | **Charge** | **Atom** | **Charge** | **Atom** | **Charge** |
| --- | --- | --- | --- | --- | --- |
| C(1) | 0.162 | S(2) | -0.368 | C(3) | -0.052 |
| C(4) | -0.067 | N(5) | -0.408 | N(6) | 0.226 |
| C(7) | -0.133 | N(8) | -0.133 | C(9) | -0.208 |
| C(10) | -0.217 | H(11) | -0.104 | H(12) | -0.101 |
| H(13) | 0.124 | H(14) | 0.342 | H(15) | 0.234 |
| H(16) | 0.096 | H(17) | 0.116 | C(18) | 0.124 |
| C(19) | 0.1084 | C(20) | 0.111 | C(21) | 0.131 |
| C(22) | 0.147 | F(23) | -0.492 | H(24) | 0.072 |
| H(25) | 0.082 |  |  |  |  |

**Table S13.** The Mulliken charge distribution for Pt(IV) complex

| **Atom** | **Charge** | **Atom** | **Charge** | **Atom** | **Charge** |
| --- | --- | --- | --- | --- | --- |
| C(1) | 0.324 | S(2) | -0.293 | C(3) | 0.029 |
| C(4) | -0.125 | N(5) | -0.292 | C(6) | -0.265 |
| C(7) | -0.002 | C(8) | -0.309 | C(9) | -0.183 |
| N(10) | -0.295 | C(11) | 0.334 | N(12) | -0.163 |
| C(13) | -0.133 | C(14) | -0.120 | C(15) | -0.295 |
| N(16) | -0.298 | C(17) | -0.328 | C(18) | 0.319 |
| S(19) | -0.276 | N(20) | 0.228 | C(21) | -0.138 |
| N(22) | -0.297 | C(23) | -0.288 | N(24) | -0.338 |
| Pt(25) | 0.784 | Cl(26) | -0.127 | Cl(27) | -0.131 |
| O(28) | 0.227 | O(29) | -0.233 | H(30) | -0.095 |
| H(31) | -0.137 | H(32) | -0.075 | H(33) | -0.292 |
| H(34) | 0.134 | H(35) | 0.136 | H(36) | -0.643 |
| H(37) | 0.640 | H(38) | 0.134 | H(39) | 0.095 |
| H(40) | 0.096 | H(41) | 0.136 | H(42) | 0.183 |
| H(43) | -0.136 | H(44) | -0.074 | H(45) | -0.293 |
| H(46) | 0.134 | F(47) | -0.596 | H(48) | -0.643 |
| H(49) | 0.642 | C(50) | -0.132 | C(51) | -0.125 |
| C(52) | -0.326 | C(53) | 0.026 | H(54) | 0.183 |
| H(55) | -0.298 | H(56) | -0.076 | H(57) | -0.073 |
